# Supplementary material for: Small molecular amine mediated synthesis of hydrophilic CdS nanorods and their photoelectrochemical water splitting performance
Source: Royal Society of Chemistry journal article supplement (doi:10.1039/c4dt02671c), 2014-11-10
Supplement: c4dt02671c1.pdf [file c4dt02671c1.pdf]

Supplementary Information for

**Small Molecular Amine Mediated Synthesis of Hydrophilic  
CdS Nanorods and their Photoelectrochemical Water  
Splitting Performance**

Chunlin Bao,<sup>a</sup> Guoxing Zhu,<sup>\*, a,b</sup> Jing Yang,<sup>a</sup> Miaomiao Liu,<sup>a</sup> Rongxian Zhang,<sup>a</sup> and Xiaoping  
Shen<sup>\*, a</sup>

<sup>a</sup>School of Chemistry and Chemical Engineering, Jiangsu University, Zhenjiang, 212013, China,

Fax: (+86)511-84401889; Tel: (+86)511-84401889; E-mail: [zhuguoxing@ujs.edu.cn](mailto:zhuguoxing@ujs.edu.cn);

[xiaopingshen@163.com](mailto:xiaopingshen@163.com)

<sup>b</sup>State Key Laboratory of Coordination Chemistry, Nanjing National Laboratory of  
Microstructures, Nanjing University, Nanjing, 210093, China

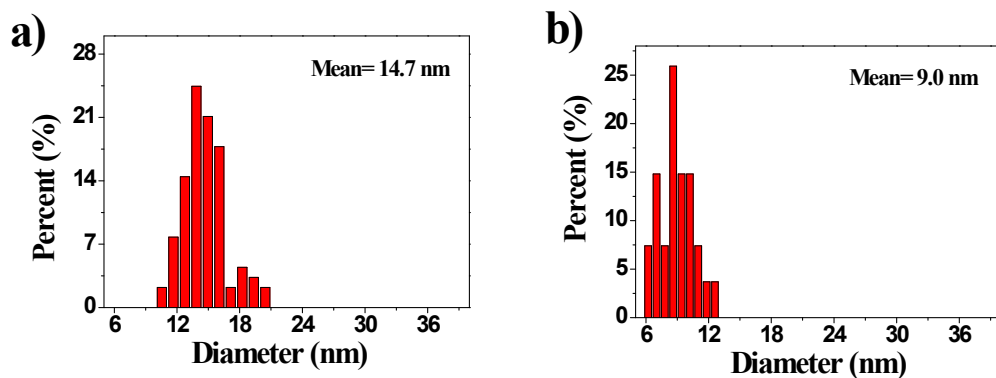

Fig. SI-1. Diameter distribution of the CdS-190 and CdS-130 product.

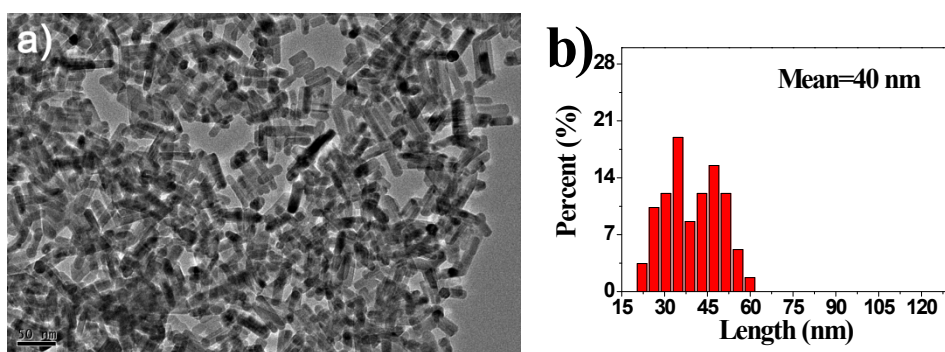

Fig. SI-2. a) TEM image and b) length distribution of CdS-150 product.

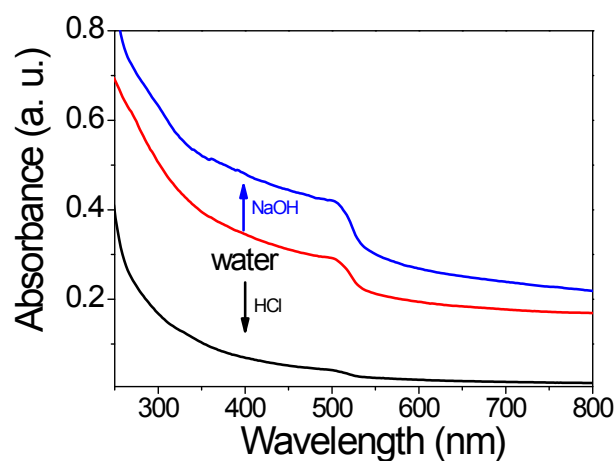

Fig. SI-3. The absorption spectra of CdS nanorods (CdS-190) dispersion (0.25 mg/mL) in aqueous solution with different pH values.

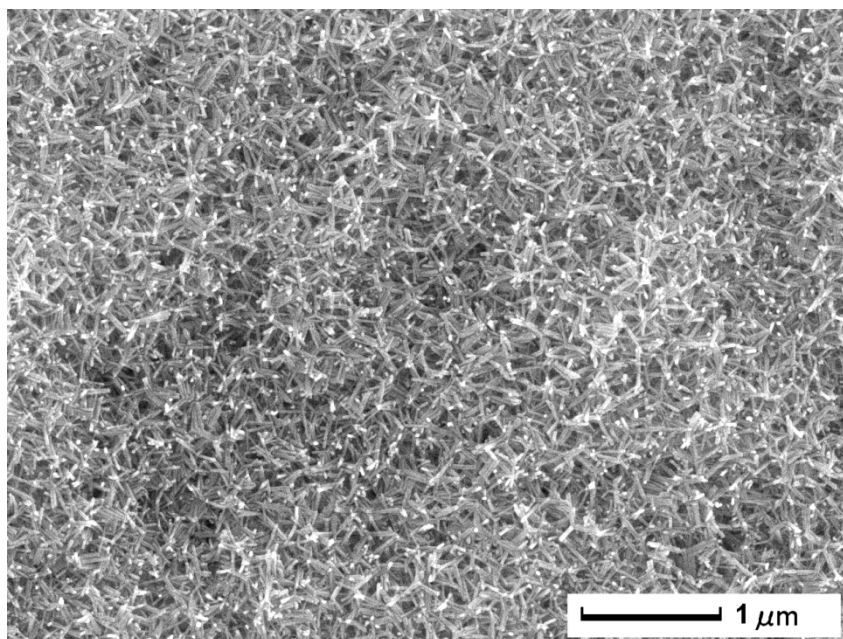

Fig. SI-4. SEM image of the CdS-190 film.

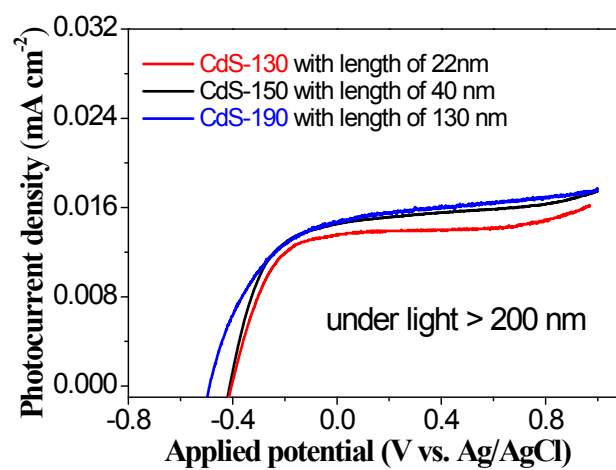

Fig. SI-5. The current-voltage characteristic of CdS photoelectrodes with different length under illumination of light  $> 200$  nm.

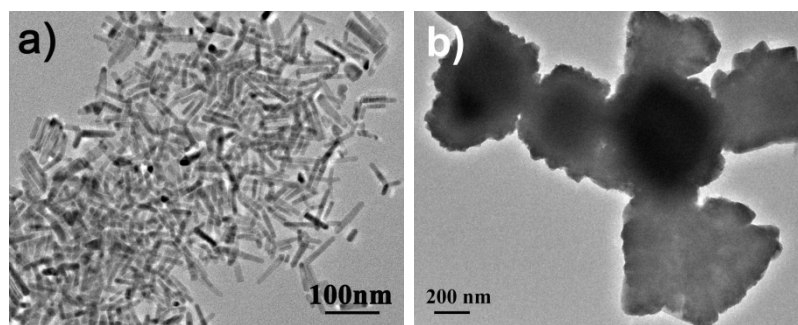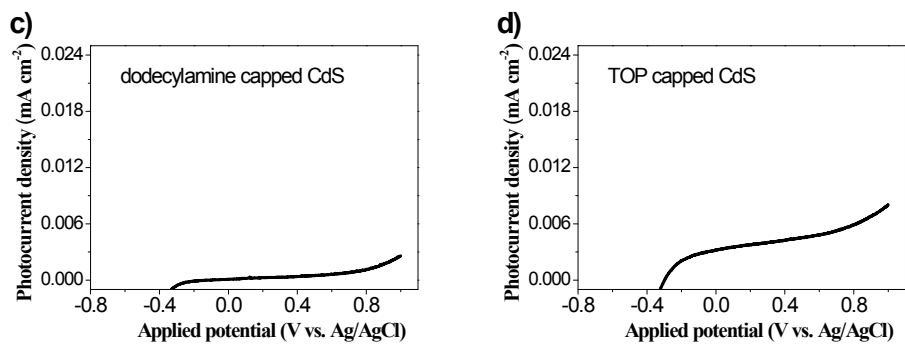

**Fig. SI-6.** TEM images of a) dodecylamine capped CdS nanorods and b) TOP capped CdS. c) The corresponding current-voltage characteristic of hydrophobic CdS thin films under illumination of light > 200 nm.

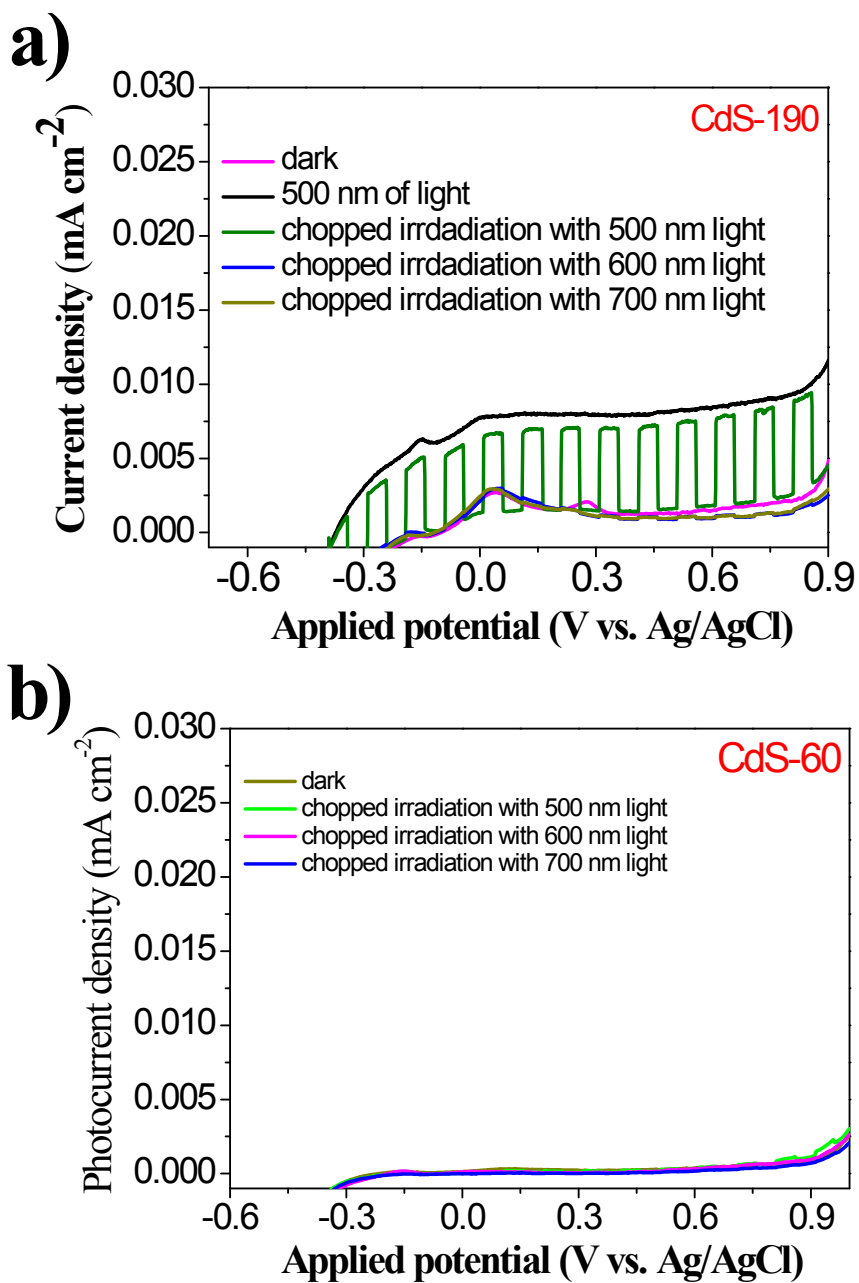

**Fig. SI-7.** The current-voltage characteristics for (a) the CdS nanorod sample (CdS-190) and (b) the CdS particle (CdS-60) thin films under chopped monochrome light illumination with wavelengths of 500, 600, 700 nm, respectively.
